# Supplementary material for: Carbon quantum dots/Ni–Al layered double hydroxide composite for high-performance supercapacitors
Source: Royal Society of Chemistry journal article supplement (doi:10.1039/c6ra02730j), 2016-01-01
Supplement: c6ra02730j1.pdf [file c6ra02730j1.pdf]

## Supporting Information

### Carbon quantum dots/Ni-Al layered double hydroxide composite for high-performance supercapacitors

Ying Wei<sup>a</sup>, Xuelei Zhang<sup>a</sup>, Xuanyu Wu<sup>a</sup>, Di Tang<sup>c</sup>, Kedi Cai<sup>a</sup> and Qingguo Zhang<sup>\*b</sup>

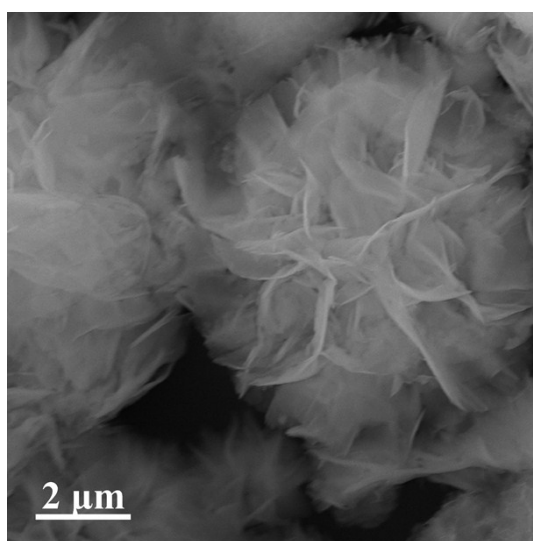

Fig. S1 SEM images of NiAl-LDH+CQDs.

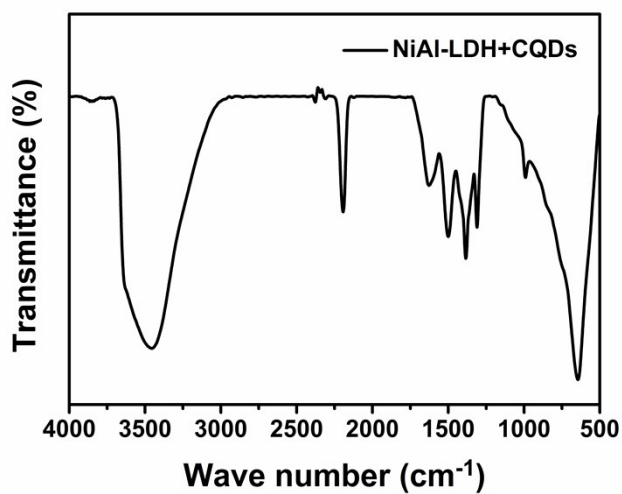

Fig. S2 FT-IR spectra for NiAl-LDH+CQDs.

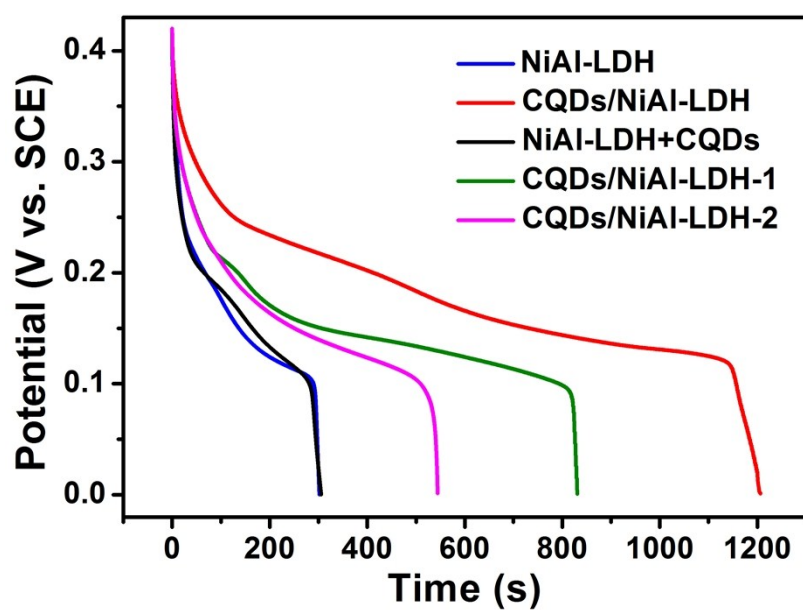

Fig. S3 The discharge curves of NiAl-LDH, CQDs/NiAl-LDH, NiAl-LDH+CQDs, CQDs/NiAl-LDH-1 and CQDs/NiAl-LDH-2 composites at current densities of  $2 \text{ A g}^{-1}$  in 6 M KOH aqueous solution.
